# Supplementary material
Source: PubMed Central journal article supplement (PMC8298006)
Supplement: mmc1.pdf [file mmc1.pdf]

# THE LANCET

## Supplementary appendix

This appendix formed part of the original submission. We post it as supplied by the authors.

Supplement to: Horby P, Staplin N, Haynes R, Landray M. Tocilizumab in COVID-19 therapy: who benefits, and how?—Authors' reply. *Lancet* 2021; **398**: 300.

Appendix.

Authors' reply to correspondence from Yang and Neumann regarding Lancet 2021;397: 1637–45.

**Table. Effect of allocation to tocilizumab on thrombotic events**

|                                | Treatment allocation |                     | RR (95% CI)      | p value |
|--------------------------------|----------------------|---------------------|------------------|---------|
|                                | Tocilizumab (n=2022) | Usual care (n=2094) |                  |         |
| Number with follow-up form*    | 1220                 | 1278                |                  |         |
| Thrombotic events              |                      |                     |                  |         |
| Pulmonary embolism             | 86 (7.0%)            | 77 (6.0%)           | 1.17 (0.87-1.58) | 0.30    |
| Deep-vein thrombosis           | 6 (0.5%)             | 4 (0.3%)            | 1.57 (0.44-5.55) | 0.48    |
| Ischaemic stroke               | 3 (0.2%)             | 6 (0.5%)            | 0.52 (0.13-2.09) | 0.36    |
| Myocardial infarction          | 7 (0.6%)             | 9 (0.7%)            | 0.81 (0.30-2.18) | 0.68    |
| Systemic arterial embolism     | 2 (0.2%)             | 2 (0.2%)            | 1.05 (0.15-7.43) | 0.96    |
| Subtotal: Any thrombotic event | 98 (8.0%)            | 92 (7.2%)           | 1.12 (0.85-1.47) | 0.43    |

\*Information on new thrombotic events was only collected on follow-up forms from 1 November 2020 onwards; percentages are of those with such a form completed.

Appendix.

Authors' reply to correspondence from Yang and Neumann regarding Lancet 2021;397: 1637–45.

Figure: Effect of allocation to tocilizumab on 28-day mortality by baseline C-reactive protein level

### Effect of allocation to tocilizumab on 28-day mortality by baseline C-reactive protein

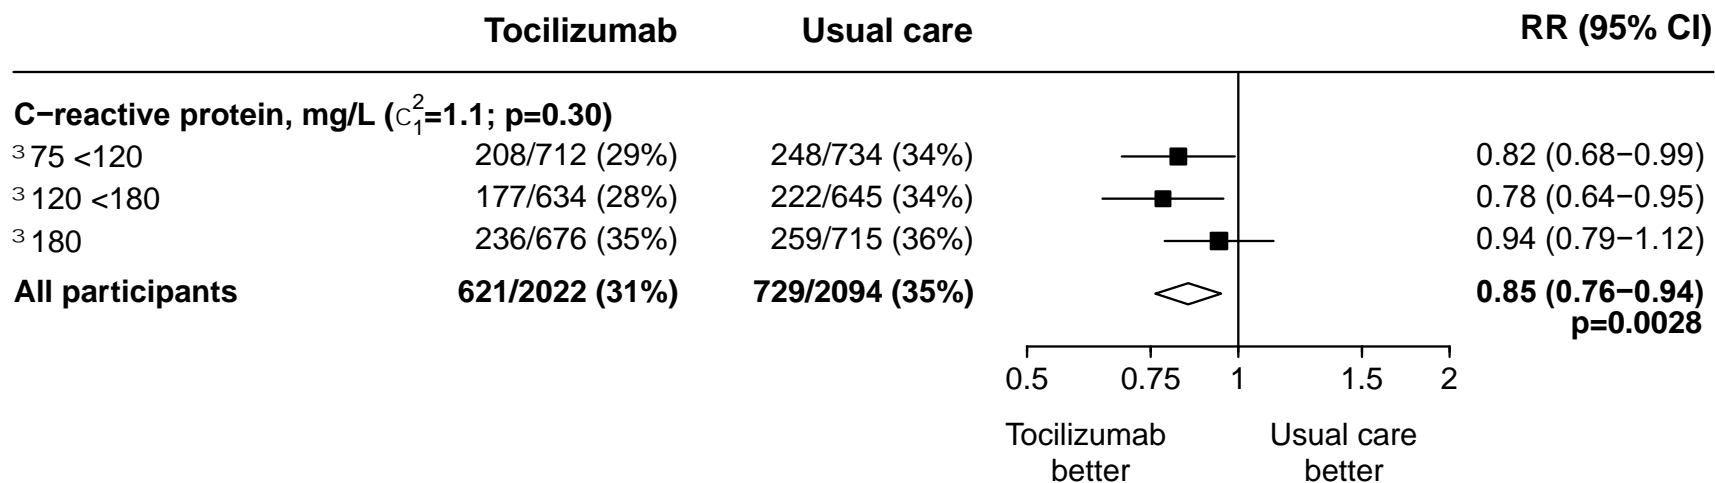

Subgroup-specific rate ratio estimates are represented by squares (with areas of the squares proportional to the amount of statistical information) and the lines through them correspond to the 95% CIs.
